# Supplementary material for: Phylomitogenomics elucidates the evolution of symbiosis in Thoracotremata (Decapoda: Cryptochiridae, Pinnotheridae, Varunidae)
Source: PeerJ journal article supplement (doi:10.7717/peerj.16217), 2023-10-16

A

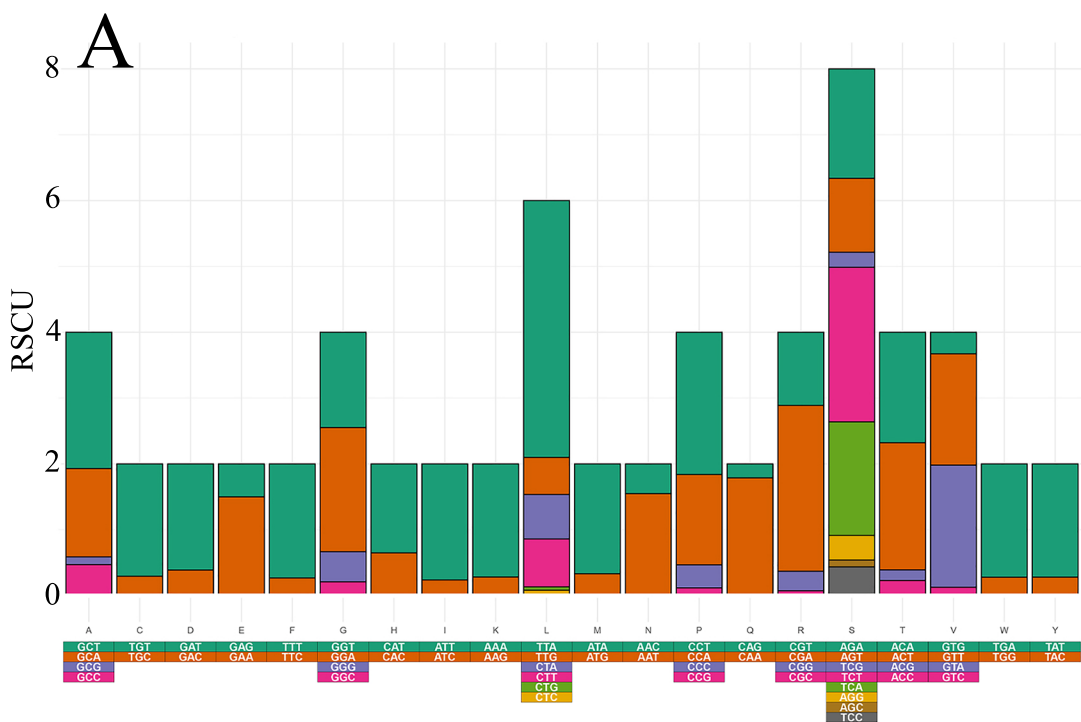

B

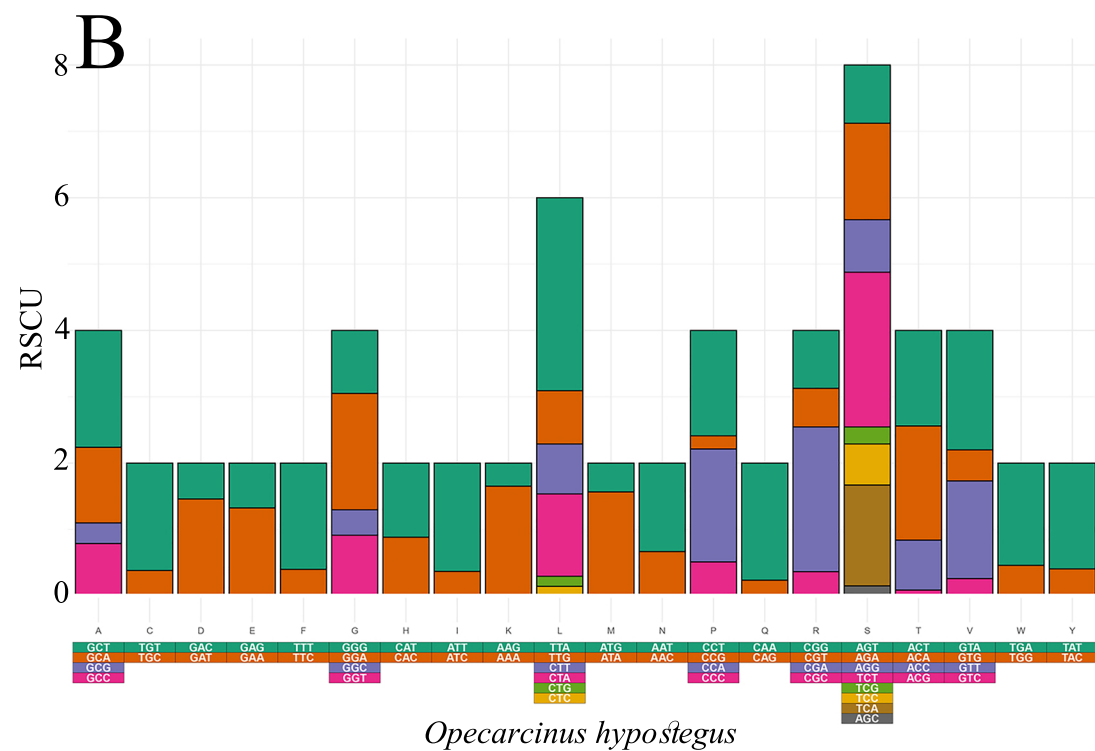

C

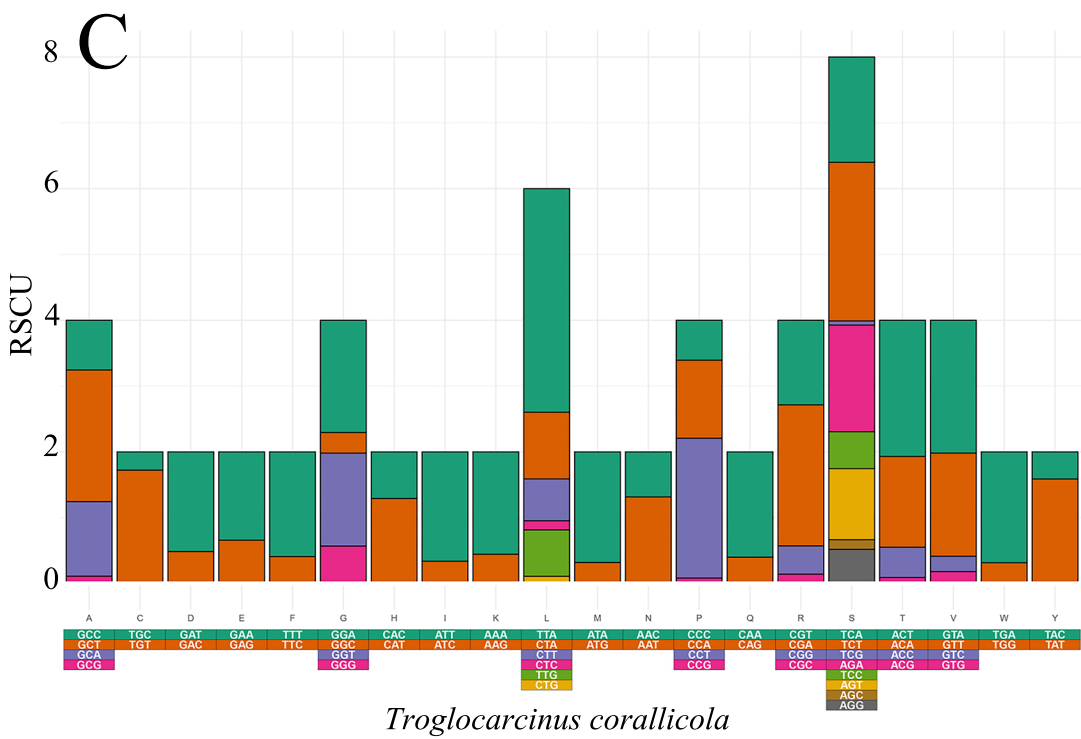

D

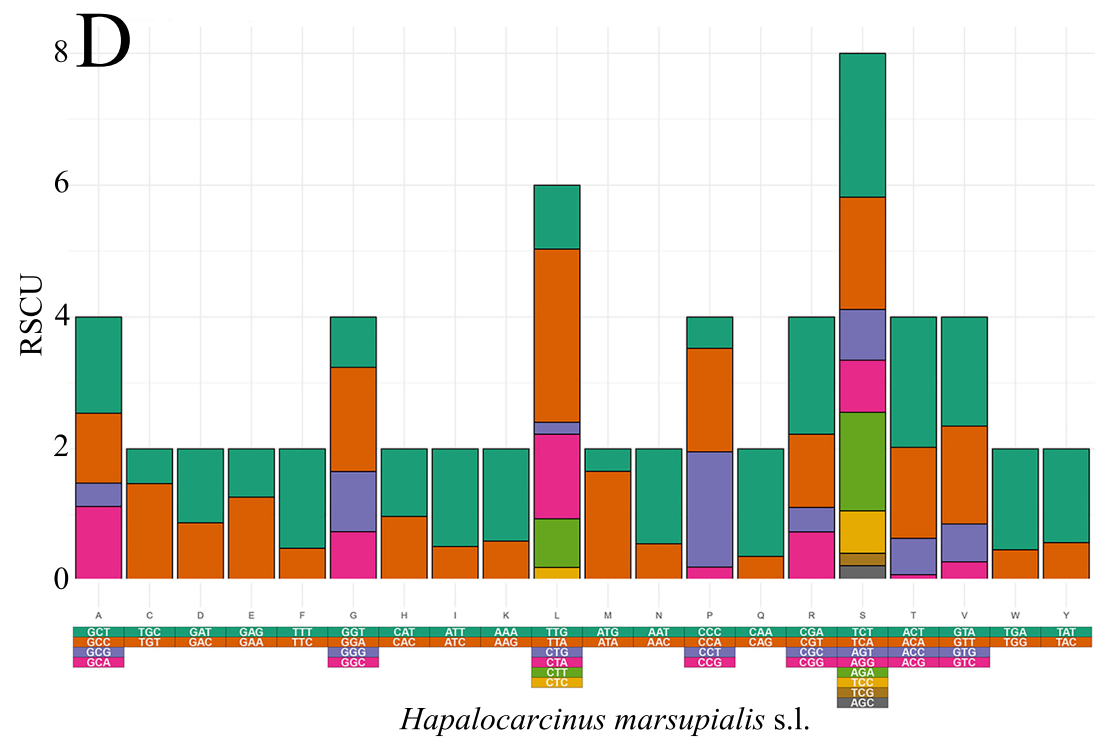

Supplement: Figure_S1.pdf [file Figure_S1.pdf]
