# Supplementary material for: Phylomitogenomics elucidates the evolution of symbiosis in Thoracotremata (Decapoda: Cryptochiridae, Pinnotheridae, Varunidae)
Source: PeerJ journal article supplement (doi:10.7717/peerj.16217), 2023-10-16
Supplement: Figure_S2B.pdf [file Figure_S2B.pdf]

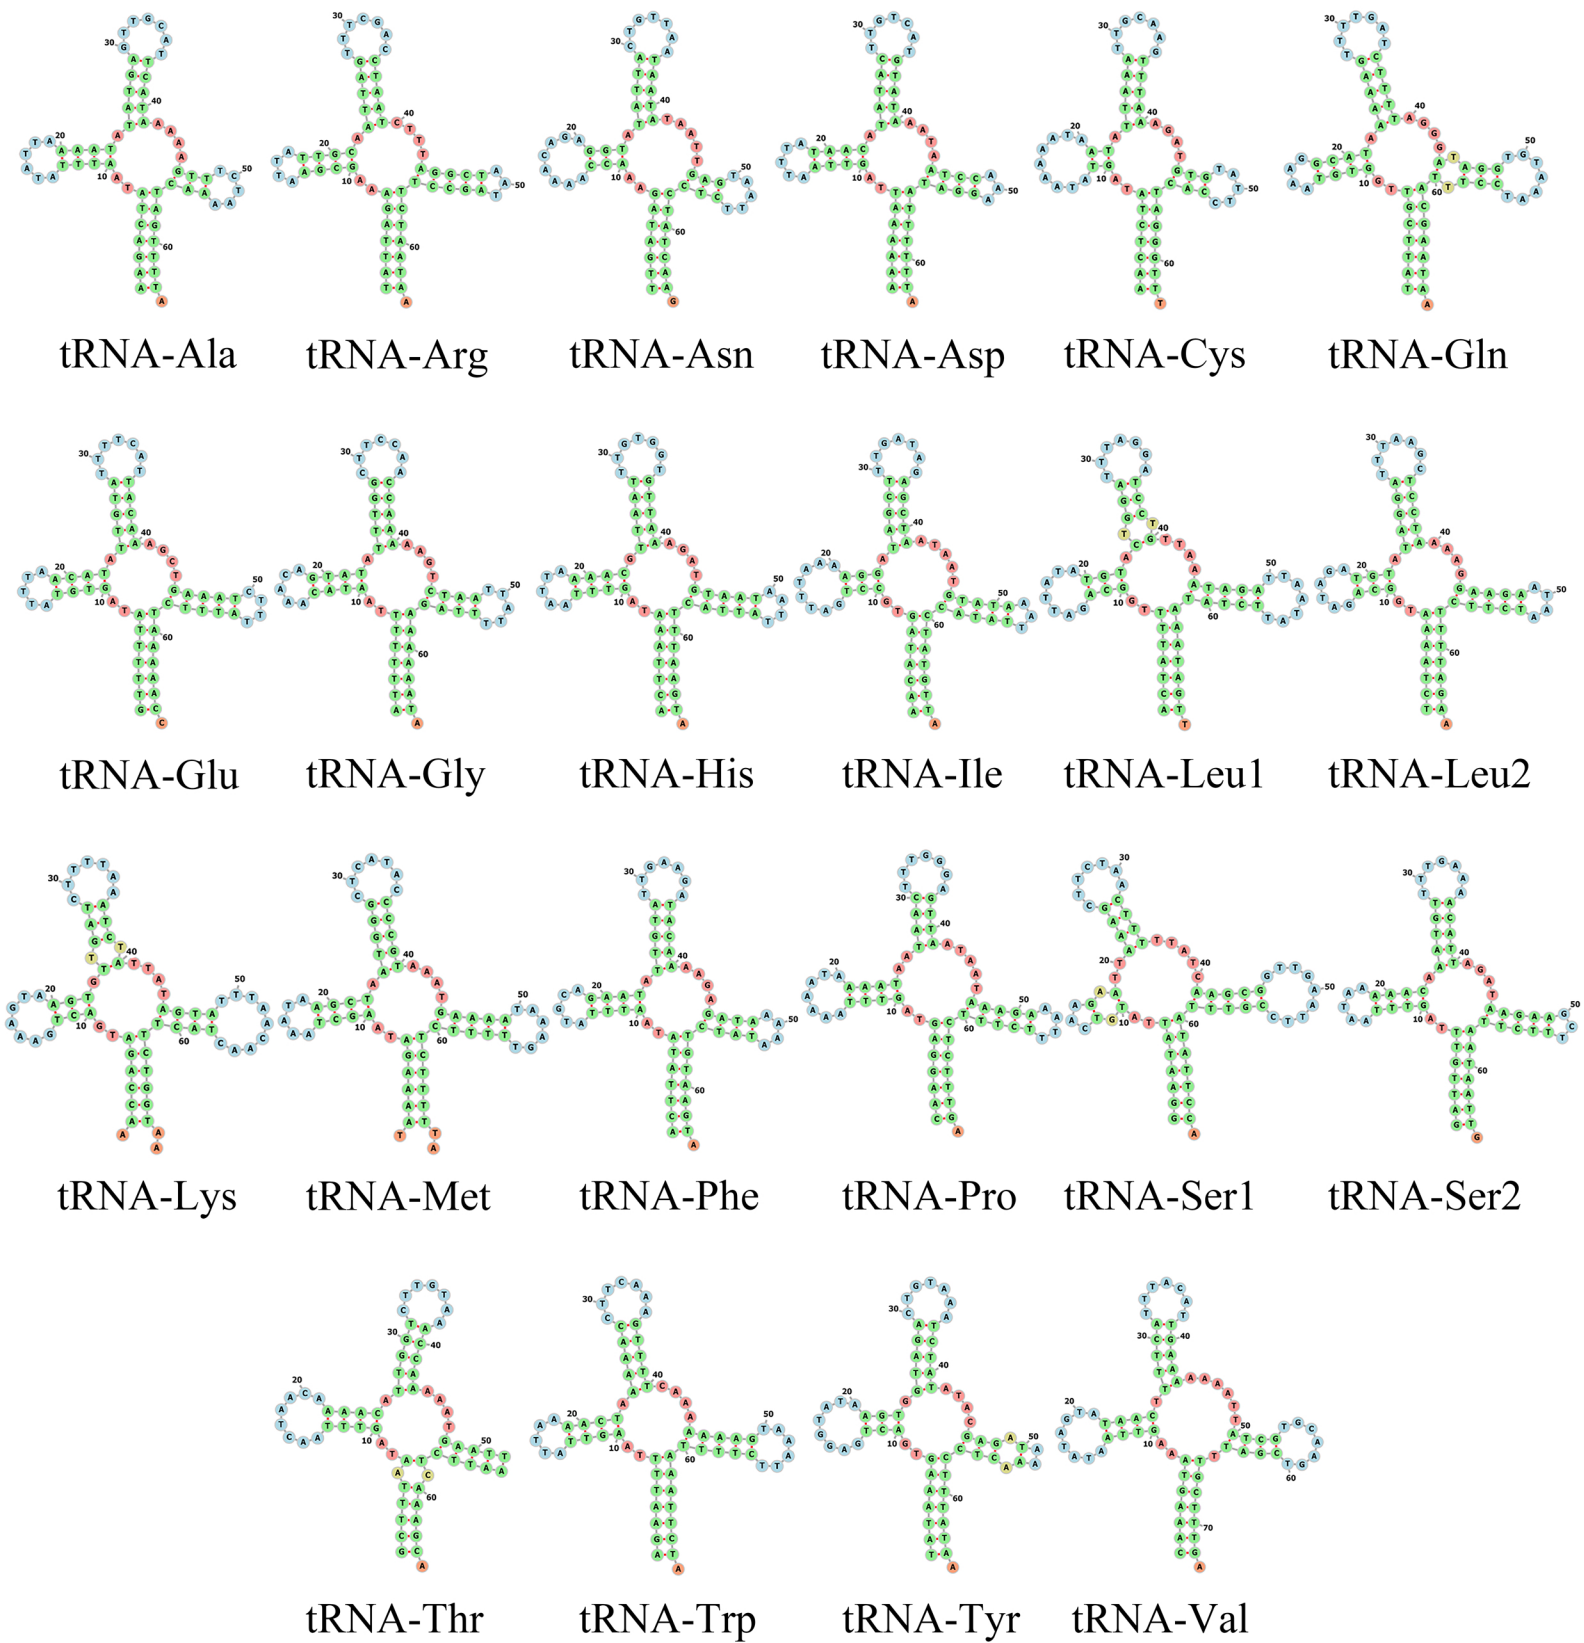

B) Secondary structures of 22 transfer RNA genes in *Kroppcarcinus siderastreicola*
