# Supplementary material for: Phylomitogenomics elucidates the evolution of symbiosis in Thoracotremata (Decapoda: Cryptochiridae, Pinnotheridae, Varunidae)
Source: PeerJ. 2023 Oct 16;11:e16217. doi: 10.7717/peerj.16217 (PMC10586294; doi:10.7717/peerj.16217)
Supplement: Supplemental Information 2 [file peerj-11-16217-s002.xlsx]

## Sheet: Captions
Table S1	The GenBank accession numbers for the mitochondrial genomes of the 80 Brachyura species used in this study.
Table S2	Annotation of the complete mitochondrial genomes of Troglocarcinus corallicola, Kroppcarcinus siderastreicola, Opecarcinus hypostegus and Hapalocarcinus marsupialis s.l.
Table S3	Relative Synonymous Codon Usage (RSCU) of Protein Coding Genes (PCG) for Troglocarcinus corallicola, Kroppcarcinus siderastreicola, Opecarcinus hypostegus and Hapalocarcinus marsupialis s.l.
Table S4	Nucleotide composition and skewness of 75 mitochondrial genomes in the Thoracotremata
Table S5	Partition scheme and best-fit substitution model for the phylogenetic analyses in this study
Table S6	Omega ratios for 13 Protein Coding Genes (PCG) in the free-ratio model

## Sheet: Table S1
Subsection	Superfamily	Family	Species	Bp	GenBank No.	Accession code	Lifestyle (Symbiotic=1; free-living=0)	Host (symbiotic taxa)	Reference
Thoracotremata	Cryptochiroidea	Cryptochiridae	Hapalocarcinus marsupialis s.l.	15422	OL661268	https://www.ncbi.nlm.nih.gov/nuccore/OL661268	1	Scleractinia: Pocilloporidae	Bähr S, Johnson ML, Berumen ML, Hardenstine RS, Rich WA, and van der Meij SE. 2021. Morphology and reproduction in the Hapalocarcinus marsupialis Stimpson, 1859 species complex (Decapoda: Brachyura: Cryptochiridae). Journal of Crustacean Biology 41:ruab052. https://doi.org/10.1093/jcbiol/ruab052.
			Kroppcarcinus siderastreicola	15629	OQ308778	https://www.ncbi.nlm.nih.gov/nuccore/OQ308778	1	Scleractinia: Astrocoeniidae, Siderastreidae	van der Meij SE. 2014. Host species, range extensions, and an observation of the mating system of Atlantic shallow-water gall crabs (Decapoda: Cryptochiridae). Bulletin of Marine Science 90:1001-1010. https://doi.org/10.5343/bms.2014.1017.
			Opecarcinus hypostegus	15702	OQ308779	https://www.ncbi.nlm.nih.gov/nuccore/OQ308779	1	Scleractinia: Agariciidae	van der Meij SE. 2014. Host species, range extensions, and an observation of the mating system of Atlantic shallow-water gall crabs (Decapoda: Cryptochiridae). Bulletin of Marine Science 90:1001-1010. https://doi.org/10.5343/bms.2014.1017.
			Troglocarcinus corallicola	15637	OQ308780	https://www.ncbi.nlm.nih.gov/nuccore/OQ308780	1	Scleractinia: Caryophylliidae, Meandrinidae, Merulinidae, Mussidae, Oculinidae	van der Meij SE. 2014. Host species, range extensions, and an observation of the mating system of Atlantic shallow-water gall crabs (Decapoda: Cryptochiridae). Bulletin of Marine Science 90:1001-1010. https://doi.org/10.5343/bms.2014.1017.
	Grapsoidea	Gecarcinidae	Cardisoma armatum	15586	MW165227	https://www.ncbi.nlm.nih.gov/nuccore/MW165227	0
			Cardisoma carnifex	15597	MF461623	https://www.ncbi.nlm.nih.gov/nuccore/MF461623	0
			Gecarcoidea lalandii	15575	MW125543	https://www.ncbi.nlm.nih.gov/nuccore/MW125543	0
		Grapsidae	Grapsus albolineatus	15578	MT755825	https://www.ncbi.nlm.nih.gov/nuccore/MT755825	0
			Grapsus tenuicrustatus	15858	KT878721	https://www.ncbi.nlm.nih.gov/nuccore/KT878721	0
			Metopograpsus frontalis	15587	MH028874	https://www.ncbi.nlm.nih.gov/nuccore/MH028874	0
			Metopograpsus quadridentatus	15517	MH183127	https://www.ncbi.nlm.nih.gov/nuccore/MH183127	0
			Pachygrapsus crassipes	15652	KC878511	https://www.ncbi.nlm.nih.gov/nuccore/KC878511	0
			Pachygrapsus marmoratus	15406	MF457403	https://www.ncbi.nlm.nih.gov/nuccore/MF457403	0
		Plagusiidae	Plagusia squamosa	15460	OL661266	https://www.ncbi.nlm.nih.gov/nuccore/OL661266	0
		Sesarmidae	Chiromantes haematocheir	15899	MH457175	https://www.ncbi.nlm.nih.gov/nuccore/MH457175	0
			Clistocoeloma sinense	15706	KU589292	https://www.ncbi.nlm.nih.gov/nuccore/KU589292	0
			Cristarma eulimene	15894	MN877385	https://www.ncbi.nlm.nih.gov/nuccore/MN877385	0
			Metopaulias depressus	15765	KX118277	https://www.ncbi.nlm.nih.gov/nuccore/KX118277	0
			Nanosesarma minutum	15637	MH899177	https://www.ncbi.nlm.nih.gov/nuccore/MH899177	0
			Orisarma dehaani	15917	MH593563	https://www.ncbi.nlm.nih.gov/nuccore/MH593563	0
			Orisarma neglectum	15920	KX156954	https://www.ncbi.nlm.nih.gov/nuccore/KX156954	0
			Orisarma sinense	15905	KR336554	https://www.ncbi.nlm.nih.gov/nuccore/KR336554	0
			Parasesarma affine	15638	MH310444	https://www.ncbi.nlm.nih.gov/nuccore/MH310444	0
			Parasesarma bidens	15641	KY808394	https://www.ncbi.nlm.nih.gov/nuccore/KY808394	0
			Parasesarma pictum	15611	MG580780	https://www.ncbi.nlm.nih.gov/nuccore/MG580780	0
			Parasesarma tripectinis	15612	KU343209	https://www.ncbi.nlm.nih.gov/nuccore/KU343209	0
		Varunidae	Asthenognathus inaequipes	15959	OL661267	https://www.ncbi.nlm.nih.gov/nuccore/OL661267	1	Holothuroidea	Lee SH, Lee KH, and Ko HS. 2010. First record of holothurian symbiotic crab Asthenognathus inaequipes (Decapoda: Brachyura: Varunidae) from Korea. Animal Systematics, Evolution and Diversity 26:337-339. https://doi.org/10.5635/KJSZ.2010.26.3.337.
			Chasmagnathus convexus	16212	MW125544	https://www.ncbi.nlm.nih.gov/nuccore/MW125544.1	0
			Cyclograpsus intermedius	16184	MT621398	https://www.ncbi.nlm.nih.gov/nuccore/MT621398	0
			Eriocheir hepuensis	16397	MK159104	https://www.ncbi.nlm.nih.gov/nuccore/MK159104	0
			Eriocheir japonica	16352	FJ455505	https://www.ncbi.nlm.nih.gov/nuccore/FJ455505	0
			Eriocheir sinensis	16350	KP064329	https://www.ncbi.nlm.nih.gov/nuccore/KP064329	0
			Gaetice depressus	16288	MH183128	https://www.ncbi.nlm.nih.gov/nuccore/MH183128	0
			Helicana wuana	16359	KX344898	https://www.ncbi.nlm.nih.gov/nuccore/KX344898	0
			Helice latimera	16246	KU589291	https://www.ncbi.nlm.nih.gov/nuccore/KU589291	0
			Helice tientsinensis	16212	KR336555	https://www.ncbi.nlm.nih.gov/nuccore/KR336555	0
			Hemigrapsus penicillatus	16486	MG751772	https://www.ncbi.nlm.nih.gov/nuccore/MG751772	0
			Hemigrapsus sanguineus	16275	KX456205	https://www.ncbi.nlm.nih.gov/nuccore/KX456205	0
			Metaplax longipes	16305	MH899176	https://www.ncbi.nlm.nih.gov/nuccore/MH899176	0
			Neoeriocheir leptognathus	16143	MH593561	https://www.ncbi.nlm.nih.gov/nuccore/MH593561	0
			Pseudohelice subquadrata	16898	MH718959	https://www.ncbi.nlm.nih.gov/nuccore/MH718959	0
			Tritodynamia horvathi	16235	OL661263	https://www.ncbi.nlm.nih.gov/nuccore/OL661263.1	1	Polychaeta: Loimia medusa	Sakai, 1976
			Varuna litterata	16247	MF198252	https://www.ncbi.nlm.nih.gov/nuccore/MF198252	0
			Varuna yui	15915	MG756602	https://www.ncbi.nlm.nih.gov/nuccore/MG756602	0
		Xenograpsidae	Xenograpsus ngatama	16106	KY985236	https://www.ncbi.nlm.nih.gov/nuccore/KY985236	0
			Xenograpsus testudinatus	15798	EU727203	https://www.ncbi.nlm.nih.gov/nuccore/EU727203	0
	Ocypodoidea	Camptandriidae	Cleistostoma dilatatum	15443	OL661264	https://www.ncbi.nlm.nih.gov/nuccore/OL661264.1	0
		Dotillidae	Dotilla wichmanni	15600	MH183129	https://www.ncbi.nlm.nih.gov/nuccore/MH183129	0
			Ilyoplax deschampsi	15460	JF909979	https://www.ncbi.nlm.nih.gov/nuccore/JF909979	0
			Scopimera intermedia	16252	MW165226	https://www.ncbi.nlm.nih.gov/nuccore/MW165226	0
		Macrophthalmidae	Macrophthalmus abbreviatus	16322	MN393095	https://www.ncbi.nlm.nih.gov/nuccore/MN393095	0
			Macrophthalmus darwinensis	16348	MF457408	https://www.ncbi.nlm.nih.gov/nuccore/MF457408	0
			Macrophthalmus japonicus	16170	KU343211	https://www.ncbi.nlm.nih.gov/nuccore/KU343211.1	0
			Macrophthalmus pacificus	17226	MK584556	https://www.ncbi.nlm.nih.gov/nuccore/MK584556	0
		Mictyridae	Mictyris longicarpus	15548	LN611670	https://www.ncbi.nlm.nih.gov/nuccore/LN611670	0
		Ocypodidae	Austruca lactea	15659	KY865330	https://www.ncbi.nlm.nih.gov/nuccore/KY865330	0
			Cranuca inversa	15677	MF457405	https://www.ncbi.nlm.nih.gov/nuccore/MF457405	0
			Gelasimus borealis	15659	MH183126	https://www.ncbi.nlm.nih.gov/nuccore/MH183126	0
			Minuca minax	15937	MT012731	https://www.ncbi.nlm.nih.gov/nuccore/MT012731	0
			Ocypode ceratophthalmus	15555	MW255974	https://www.ncbi.nlm.nih.gov/nuccore/MW255974	0
			Ocypode cordimanus	15604	KT896743	https://www.ncbi.nlm.nih.gov/nuccore/KT896743	0
			Ocypode stimpsoni	15557	MN917464	https://www.ncbi.nlm.nih.gov/nuccore/MN917464	0
			Tubuca capricornis	15629	MF457401	https://www.ncbi.nlm.nih.gov/nuccore/MF457401	0
			Tubuca paradussumieri	15614	MN072633	https://www.ncbi.nlm.nih.gov/nuccore/MN072633	0
			Tubuca polita	15672	MF457400	https://www.ncbi.nlm.nih.gov/nuccore/MF457400	0
			Tubuca rosea	15643	MN072632	https://www.ncbi.nlm.nih.gov/nuccore/MN072632	0
		Xenophthalmidae	Xenophthalmus pinnotheroides	16212	OL661265	https://www.ncbi.nlm.nih.gov/nuccore/OL661265.1	0
	Pinnotheroidea	Pinnotheridae	Amusiotheres obtusidentatus	16085	OL661262	https://www.ncbi.nlm.nih.gov/nuccore/OL661262	1	Mollusca: Amusium pleuronectes, Ylistrum japonicum	de Gier W, and Becker C. 2020. A review of the ecomorphology of pinnotherine pea crabs (Brachyura: Pinnotheridae), with an updated list of symbiont-host associations. Diversity 12:431. https://www.mdpi.com/1424-2818/12/11/431.
			Arcotheres purpureus	16371	OL661260	https://www.ncbi.nlm.nih.gov/nuccore/OL661260	1	Mollusca: Ostrea, Protapes gallus	de Gier W, and Becker C. 2020. A review of the ecomorphology of pinnotherine pea crabs (Brachyura: Pinnotheridae), with an updated list of symbiont-host associations. Diversity 12:431. https://www.mdpi.com/1424-2818/12/11/431.
			Arcotheres sinensis	16490	OL579740	https://www.ncbi.nlm.nih.gov/nuccore/OL579740	1	Mollusca: Alectryonella plicatula, ? Chlamys nipponensis, Magallana angulata, Magallana gigas, Meretrix lusoria, Modiolus auriculatus, Mytilus unguiculatus, Mytilus edulis, Ruditapes philippinarum, Venerupis aspera	de Gier W, and Becker C. 2020. A review of the ecomorphology of pinnotherine pea crabs (Brachyura: Pinnotheridae), with an updated list of symbiont-host associations. Diversity 12:431. https://www.mdpi.com/1424-2818/12/11/431.
			Arcotheres sp.	16358	LC715479	https://www.ncbi.nlm.nih.gov/nuccore/LC715479	1	Mollusca: Barbatia virescens	Kobayashi G, Itoh H, and Nakajima N. 2023. Molecular phylogeny of thoracotreme crabs including nine newly determined mitochondrial genomes. Zoological Science 40:224-234. https://doi.org/10.2108/zs220063.
			Indopinnixa haematosticta	16301	LC715477	https://www.ncbi.nlm.nih.gov/nuccore/2476778598	1	Annelida: ? Siphonosoma cumanense	Palacios Theil E, Cuesta JA, and Felder DL. 2016. Molecular evidence for non-monophyly of the pinnotheroid crabs (Crustacea: Brachyura: Pinnotheroidea), warranting taxonomic reappraisal. Invertebrate Systematics 30:1-27. https://doi.org/10.1071/IS15023.
			Pinnaxodes major	16233	OL657229	https://www.ncbi.nlm.nih.gov/nuccore/OL657229.1	1	Mollusca: Barnea, Crenomytilus grayanus, Gregariella difficilis, Mactra antiqua, Meretrix lamarckii, Ruditapes philippinarum Holothuroidea: Holothuria (Mertensiothuria) hilla	Palacios Theil E, Cuesta JA, and Felder DL. 2016. Molecular evidence for non-monophyly of the pinnotheroid crabs (Crustacea: Brachyura: Pinnotheroidea), warranting taxonomic reappraisal. Invertebrate Systematics 30:1-27. https://doi.org/10.1071/IS15023.
			Pinnotheres excussus	16101	OL661261	https://www.ncbi.nlm.nih.gov/nuccore/OL661261.1	1	Mollusca: Gafrarium sp.	de Gier W, and Becker C. 2020. A review of the ecomorphology of pinnotherine pea crabs (Brachyura: Pinnotheridae), with an updated list of symbiont-host associations. Diversity 12:431. https://www.mdpi.com/1424-2818/12/11/431.
			Pinnotheres pholadis	16071	OL579739	https://www.ncbi.nlm.nih.gov/nuccore/OL579739.1	1	Mollusca: Barnea manilensis, Chlamys farreri, Mactra chinensis, Magallana gigas, Meretrix lusoria, Mimachlamys crassicostata or sanguinea, Mytilus edulis, Pecten albicans, Ruditapes philippinarum, Spisula sachalinensis	Palacios Theil E, Cuesta JA, and Felder DL. 2016. Molecular evidence for non-monophyly of the pinnotheroid crabs (Crustacea: Brachyura: Pinnotheroidea), warranting taxonomic reappraisal. Invertebrate Systematics 30:1-27. https://doi.org/10.1071/IS15023.
Heterotremata	Bythograeoidea	Bythograeidae	Segonzacia mesatlantica	15521	KY541839	https://www.ncbi.nlm.nih.gov/nuccore/KY541839			Outgroup
	Calappoidea	Matutidae	Ashtoret lunaris	15807	LK391941	https://www.ncbi.nlm.nih.gov/nuccore/LK391941			Outgroup
	Leucosioidea	Leucosiidae	Pyrhila pisum	15516	KU343210	https://www.ncbi.nlm.nih.gov/nuccore/KU343210			Outgroup
	Portunoidea	Portunidae	Portunus gracilimanus	15990	MH729187	https://www.ncbi.nlm.nih.gov/nuccore/MH729187			Outgroup
	Xanthoidea	Xanthidae	Leptodius sanguineus	15480	KT896744	https://www.ncbi.nlm.nih.gov/nuccore/KT896744			Outgroup

## Sheet: Table S2
Troglocarcinus corallicola
Gene	Abbreviated names of tRNA genes	From	To	Strand	Length (bp)	Intergenic length	Start Codon/Stop Codon
cox1		1	1534	+	1534	0	ATG/TAA
tRNA-Leu2	L2	1535	1600	+	66	3
cox2		1604	2291	+	688	1	ATG/TAA
tRNA-Lys	K	2293	2359	+	67	0
tRNA-Asp	D	2360	2421	+	62	1
atp8		2423	2581	+	159	-4	ATG/TAA
atp6		2578	3249	+	672	-1	ATA/TAA
cox3		3249	4038	+	790	-1	ATG/T(AA)
tRNA-Gly	G	4038	4103	+	66	14
nad3		4118	4453	+	336	2	ATA/TAA
tRNA-Ala	A	4456	4523	+	68	0
tRNA-Arg	R	4524	4588	+	65	-1
tRNA-Asn	N	4588	4651	+	64	5
tRNA-Ser1	S1	4657	4724	+	68	1
tRNA-Glu	E	4726	4792	+	67	-1
tRNA-His	H	4792	4857	-	66	14
tRNA-Thr	T	4872	4936	+	65	85
nad6		5022	5453	+	432	-1	ATT/TAA
cob		5453	6587	+	1135	-1	ATG/T(AA)
tRNA-Ser2	S2	6587	6656	+	70	72
tRNA-Phe	F	6729	6792	-	64	11
nad5		6804	8534	-	1731	33	ATT/TAA
nad4		8568	9911	-	1344	-7	ATG/TAA
nad4l		9905	10207	-	303	41	ATG/TAA
tRNA-Pro	P	10249	10318	-	70	30
nad1		10349	11290	-	942	28	ATA/TAA
tRNA-Leu1	L1	11319	11387	-	69	1
rrnL		11389	12679	-	1291	13
tRNA-Val	V	12693	12764	-	72	2
rrnS		12767	13582	-	816	0
CR		13583	14188		606	0
tRNA-Ile	I	14189	14255	+	67	-4
tRNA-Gln	Q	14252	14321	-	70	32
tRNA-Met	M	14354	14425	+	72	23
nad2		14449	15435	+	987	0	ATT/TAG
tRNA-Trp	W	15436	15503	+	68	5
tRNA-Cys	C	15509	15571	-	63	0
tRNA-Tyr	Y	15572	15637	-	66	0
Kroppcarcinus siderastreicola
Gene	Abbreviated names of tRNA genes	From	To	Strand	Length (bp)	Intergenic length	Start Codon/Stop Codon
cox1		1	1534	+	1534	0	ATG/TAA
tRNA-Leu2	L2	1535	1599	+	65	5
cox2		1605	2295	+	691	1	ATG/TAA
tRNA-Lys	K	2297	2363	+	67	-1
tRNA-Asp	D	2363	2425	+	63	9
atp8		2435	2584	+	150	-4	ATT/TAA
atp6		2581	3252	+	672	-1	ATA/TAA
cox3		3252	4041	+	790	-1	ATG/T(AA)
tRNA-Gly	G	4041	4107	+	67	8
nad3		4116	4457	+	342	4	ATA/TAA
tRNA-Ala	A	4462	4527	+	66	0
tRNA-Arg	R	4528	4592	+	65	2
tRNA-Asn	N	4595	4659	+	65	3
tRNA-Ser1	S1	4663	4730	+	68	4
tRNA-Glu	E	4735	4800	+	66	4
tRNA-His	H	4805	4870	-	66	53
tRNA-Thr	T	4924	4991	+	68	81
nad6		5073	5504	+	432	-1	ATT/TAA
cob		5504	6638	+	1135	-1	ATA/TAA
tRNA-Ser2	S2	6638	6705	+	68	13
tRNA-Phe	F	6719	6782	-	64	18
nad5		6801	8534	-	1734	14	ATT/TAG
nad4		8549	9916	-	1368	-7	ATA/TAA
nad4l		9910	10212	-	303	42	ATG/TAA
tRNA-Pro	P	10255	10324	-	70	26
nad1		10351	11289	-	939	29	ATA/TAA
tRNA-Leu1	L1	11319	11387	-	69	1
rrnL		11389	12685	-	1297	5
tRNA-Val	V	12691	12763	-	73	1
rrnS		12765	13571	-	807	0
CR		13572	14204		633	0
tRNA-Ile	I	14205	14271	+	67	0
tRNA-Gln	Q	14272	14341	-	70	14
tRNA-Met	M	14356	14425	+	70	23
nad2		14449	15435	+	987	0	ATT/TAG
tRNA-Trp	W	15436	15502	+	67	1
tRNA-Cys	C	15504	15566	-	63	-1
tRNA-Tyr	Y	15566	15629	-	64	0
Opecarcinus hypostegus
Gene	Abbreviated names of tRNA genes	From	To	Strand	Length (bp)	Intergenic length	Start Codon/Stop Codon
cox1		1	1534	+	1534	0	ATG/TAA
tRNA-Leu2	L2	1535	1598	+	64	2
cox2		1601	2294	+	694	3	ATG/TAA
tRNA-Lys	K	2298	2364	+	67	-1
tRNA-Asp	D	2364	2427	+	64	9
atp8		2437	2586	+	150	-4	ATT/TAA
atp6		2583	3254	+	672	-1	ATA/TAA
cox3		3254	4043	+	790	-1	ATG/T(AA)
tRNA-Gly	G	4043	4109	+	67	-1
nad3		4109	4459	+	351	2	ATG/TAA
tRNA-Ala	A	4462	4528	+	67	0
tRNA-Arg	R	4529	4594	+	66	-1
tRNA-Asn	N	4594	4658	+	65	3
tRNA-Ser1	S1	4662	4729	+	68	3
tRNA-Glu	E	4733	4800	+	68	6
tRNA-His	H	4807	4874	-	68	42
tRNA-Thr	T	4917	4984	+	68	93
nad6		5078	5515	+	438	-1	ATT/TAA
cob		5515	6649	+	1135	-1	ATG/TAA
tRNA-Ser2	S2	6649	6719	+	71	22
tRNA-Phe	F	6742	6806	-	65	42
nad5		6849	8582	-	1734	20	ATT/TAA
nad4		8603	9952	-	1350	-7	ATG/TAG
nad4l		9946	10248	-	303	33	ATG/TAA
tRNA-Pro	P	10282	10351	-	70	45
nad1		10397	11338	-	942	29	ATA/TAG
tRNA-Leu1	L1	11368	11441	-	74	-2
rrnL		11440	12750	-	1311	-8
tRNA-Val	V	12743	12815	-	73	4
rrnS		12820	13647	-	828	0
CR		13648	14244		597	0
tRNA-Ile	I	14245	14310	+	66	-4
tRNA-Gln	Q	14307	14376	-	70	45
tRNA-Met	M	14422	14494	+	73	23
nad2		14518	15504	+	987	0	ATT/TAG
tRNA-Trp	W	15505	15573	+	69	1
tRNA-Cys	C	15575	15637	-	63	0
tRNA-Tyr	Y	15638	15702	-	65	0
Hapalocarcinus marsupialis s.l.
Gene	Abbreviated names of tRNA genes	From	To	Strand	Length (bp)	Intergenic length	Start Codon/Stop Codon
cox1		1	1534	+	1534	0	ATG/TAA
tRNA-Leu2	L2	1535	1598	+	64	3
cox2		1602	2289	+	688	1	ATG/TAA
tRNA-Lys	K	2291	2357	+	67	0
tRNA-Asp	D	2358	2420	+	63	0
atp8		2421	2579	+	159	-7	ATA/TAA
atp6		2573	3247	+	675	-1	ATA/TAA
cox3		3247	4036	+	790	-1	ATG/T(AA)
tRNA-Gly	G	4036	4100	+	65	-1
nad3		4100	4450	+	351	4	ATG/TAA
tRNA-Ala	A	4455	4522	+	68	0
tRNA-Arg	R	4523	4587	+	65	-1
tRNA-Asn	N	4587	4650	+	64	2
tRNA-Ser1	S1	4653	4720	+	68	0
tRNA-Glu	E	4721	4787	+	67	4
tRNA-Thr	T	4792	4857	+	66	13
nad6		4871	5374	+	504	-1	ATT/TAA
cob		5374	6508	+	1135	-1	ATG/TAA
tRNA-Ser2	S2	6508	6578	+	71	65
tRNA-His	H	6644	6709	-	66	97
tRNA-Phe	F	6807	6870	-	64	17
nad5		6888	8621	-	1734	6	ATT/TAA
nad4		8628	10007	-	1380	-13	ATG/TAG
nad4l		9995	10297	-	303	30	ATG/TAA
tRNA-Pro	P	10328	10399	-	72	29
nad1		10429	11376	-	948	23	ATA/TAG
tRNA-Leu1	L1	11400	11467	-	68	0
rrnL		11468	12777	-	1310	0
tRNA-Val	V	12778	12847	-	70	0
rrnS		12848	13663	-	816	0
CR		13664	13971		308	0
tRNA-Ile	I	13972	14038	+	67	-4
tRNA-Gln	Q	14035	14104	-	70	34
tRNA-Met	M	14139	14207	+	69	-1
nad2		14207	15217	+	1011	0	ATT/TAG
tRNA-Trp	W	15218	15287	+	70	4
tRNA-Cys	C	15292	15354	-	63	-1
tRNA-Tyr	Y	15354	15418	-	65	4

## Sheet: Table S3
Troglocarcinus corallicola						Kroppcarcinus siderastreicola
AmAcid	Codon	Number	/1000	Fraction		AmAcid	Codon	Number	/1000	Fraction
Ala	GCG	5	1.35	0.03		Ala	GCG	5	1.35	0.03
Ala	GCA	51	13.72	0.28		Ala	GCA	57	15.33	0.34
Ala	GCT	90	24.22	0.5		Ala	GCT	88	23.68	0.52
Ala	GCC	34	9.15	0.19		Ala	GCC	20	5.38	0.12
Cys	TGT	31	8.34	0.86		Cys	TGT	29	7.8	0.85
Cys	TGC	5	1.35	0.14		Cys	TGC	5	1.35	0.15
Asp	GAT	53	14.26	0.76		Asp	GAT	54	14.53	0.81
Asp	GAC	17	4.57	0.24		Asp	GAC	13	3.5	0.19
Glu	GAG	25	6.73	0.33		Glu	GAG	20	5.38	0.25
Glu	GAA	51	13.72	0.67		Glu	GAA	60	16.14	0.75
Phe	TTT	248	66.74	0.79		Phe	TTT	278	74.79	0.87
Phe	TTC	64	17.22	0.21		Phe	TTC	43	11.57	0.13
Gly	GGG	31	8.34	0.14		Gly	GGG	24	6.46	0.11
Gly	GGA	93	25.03	0.43		Gly	GGA	99	26.63	0.47
Gly	GGT	77	20.72	0.35		Gly	GGT	76	20.45	0.36
Gly	GGC	17	4.57	0.08		Gly	GGC	11	2.96	0.05
His	CAT	51	13.72	0.65		His	CAT	50	13.45	0.68
His	CAC	28	7.53	0.35		His	CAC	24	6.46	0.32
Ile	ATT	270	72.66	0.83		Ile	ATT	311	83.67	0.88
Ile	ATC	55	14.8	0.17		Ile	ATC	42	11.3	0.12
Lys	AAG	20	5.38	0.22		Lys	AAG	13	3.5	0.14
Lys	AAA	70	18.84	0.78		Lys	AAA	79	21.25	0.86
Leu	TTG	71	19.11	0.12		Leu	TTG	55	14.8	0.09
Leu	TTA	342	92.03	0.57		Leu	TTA	381	102.5	0.65
Leu	CTG	11	2.96	0.02		Leu	CTG	5	1.35	0.01
Leu	CTA	102	27.45	0.17		Leu	CTA	66	17.76	0.11
Leu	CTT	64	17.22	0.11		Leu	CTT	71	19.1	0.12
Leu	CTC	14	3.77	0.02		Leu	CTC	8	2.15	0.01
Met	ATG	41	11.03	0.16		Met	ATG	42	11.3	0.17
Met	ATA	216	58.13	0.84		Met	ATA	211	56.77	0.83
Asn	AAT	98	26.37	0.66		Asn	AAT	127	34.17	0.77
Asn	AAC	51	13.72	0.34		Asn	AAC	37	9.95	0.23
Pro	CCG	3	0.81	0.02		Pro	CCG	4	1.08	0.03
Pro	CCA	43	11.57	0.3		Pro	CCA	47	12.64	0.34
Pro	CCT	77	20.72	0.53		Pro	CCT	74	19.91	0.54
Pro	CCC	22	5.92	0.15		Pro	CCC	12	3.23	0.09
Gln	CAG	13	3.5	0.2		Gln	CAG	7	1.88	0.11
Gln	CAA	52	13.99	0.8		Gln	CAA	59	15.87	0.89
Arg	CGG	6	1.61	0.11		Arg	CGG	4	1.08	0.07
Arg	CGA	30	8.07	0.54		Arg	CGA	34	9.15	0.63
Arg	CGT	18	4.84	0.32		Arg	CGT	15	4.04	0.28
Arg	CGC	2	0.54	0.04		Arg	CGC	1	0.27	0.02
Ser	AGG	25	6.73	0.06		Ser	AGG	18	4.84	0.05
Ser	AGA	78	20.99	0.2		Ser	AGA	80	21.52	0.21
Ser	AGT	52	13.99	0.14		Ser	AGT	54	14.53	0.14
Ser	AGC	7	1.88	0.02		Ser	AGC	5	1.35	0.01
Ser	TCG	3	0.81	0.01		Ser	TCG	11	2.96	0.03
Ser	TCA	77	20.72	0.2		Ser	TCA	83	22.33	0.22
Ser	TCT	116	31.22	0.3		Ser	TCT	113	30.4	0.29
Ser	TCC	27	7.27	0.07		Ser	TCC	21	5.65	0.05
Thr	ACG	4	1.08	0.02		Thr	ACG	7	1.88	0.04
Thr	ACA	60	16.15	0.34		Thr	ACA	73	19.64	0.42
Thr	ACT	90	24.22	0.52		Thr	ACT	84	22.6	0.48
Thr	ACC	20	5.38	0.11		Thr	ACC	10	2.69	0.06
Val	GTG	10	2.69	0.05		Val	GTG	18	4.84	0.08
Val	GTA	112	30.14	0.5		Val	GTA	102	27.44	0.46
Val	GTT	87	23.41	0.39		Val	GTT	93	25.02	0.42
Val	GTC	13	3.5	0.06		Val	GTC	7	1.88	0.03
Trp	TGG	15	4.04	0.16		Trp	TGG	13	3.5	0.14
Trp	TGA	80	21.53	0.84		Trp	TGA	80	21.52	0.86
Tyr	TAT	131	35.25	0.79		Tyr	TAT	147	39.55	0.86
Tyr	TAC	34	9.15	0.21		Tyr	TAC	24	6.46	0.14
End	TAG	1	0.27	0.08		End	TAG	2	0.54	0.15
End	TAA	12	3.23	0.92		End	TAA	11	2.96	0.85
Opecarcinus hypostegus						Hapalocarcinus marsupialis s.l.
AmAcid	Codon	Number	/1000	Fraction		AmAcid	Codon	Number	/1000	Fraction
Ala	GCG	15	4.05	0.08		Ala	GCG	16	4.36	0.09
Ala	GCA	55	14.86	0.28		Ala	GCA	51	13.89	0.28
Ala	GCT	85	22.96	0.44		Ala	GCT	66	17.97	0.36
Ala	GCC	38	10.26	0.2		Ala	GCC	48	13.07	0.27
Cys	TGT	34	9.18	0.81		Cys	TGT	28	7.62	0.74
Cys	TGC	8	2.16	0.19		Cys	TGC	10	2.72	0.26
Asp	GAT	54	14.59	0.73		Asp	GAT	37	10.07	0.56
Asp	GAC	20	5.4	0.27		Asp	GAC	29	7.9	0.44
Glu	GAG	25	6.75	0.34		Glu	GAG	30	8.17	0.37
Glu	GAA	49	13.24	0.66		Glu	GAA	52	14.16	0.63
Phe	TTT	253	68.34	0.8		Phe	TTT	227	61.8	0.75
Phe	TTC	63	17.02	0.2		Phe	TTC	74	20.15	0.25
Gly	GGG	52	14.05	0.24		Gly	GGG	49	13.34	0.23
Gly	GGA	96	25.93	0.44		Gly	GGA	85	23.14	0.4
Gly	GGT	50	13.51	0.23		Gly	GGT	41	11.16	0.19
Gly	GGC	21	5.67	0.1		Gly	GGC	40	10.89	0.19
His	CAT	43	11.62	0.56		His	CAT	41	11.16	0.51
His	CAC	34	9.18	0.44		His	CAC	39	10.62	0.49
Ile	ATT	253	68.34	0.82		Ile	ATT	237	64.52	0.74
Ile	ATC	57	15.4	0.18		Ile	ATC	83	22.6	0.26
Lys	AAG	16	4.32	0.17		Lys	AAG	25	6.81	0.3
Lys	AAA	76	20.53	0.83		Lys	AAA	58	15.79	0.7
Leu	TTG	79	21.34	0.13		Leu	TTG	96	26.14	0.16
Leu	TTA	286	77.26	0.48		Leu	TTA	260	70.79	0.44
Leu	CTG	15	4.05	0.03		Leu	CTG	18	4.9	0.03
Leu	CTA	122	32.96	0.21		Leu	CTA	127	34.58	0.21
Leu	CTT	74	19.99	0.13		Leu	CTT	73	19.87	0.12
Leu	CTC	14	3.78	0.02		Leu	CTC	20	5.45	0.03
Met	ATG	53	14.32	0.22		Met	ATG	39	10.62	0.17
Met	ATA	191	51.59	0.78		Met	ATA	190	51.73	0.83
Asn	AAT	96	25.93	0.67		Asn	AAT	113	30.77	0.72
Asn	AAC	48	12.97	0.33		Asn	AAC	44	11.98	0.28
Pro	CCG	7	1.89	0.05		Pro	CCG	7	1.91	0.05
Pro	CCA	60	16.21	0.43		Pro	CCA	53	14.43	0.39
Pro	CCT	56	15.13	0.4		Pro	CCT	59	16.06	0.44
Pro	CCC	18	4.86	0.13		Pro	CCC	16	4.36	0.12
Gln	CAG	8	2.16	0.12		Gln	CAG	12	3.27	0.18
Gln	CAA	60	16.21	0.88		Gln	CAA	53	14.43	0.82
Arg	CGG	12	3.24	0.22		Arg	CGG	10	2.72	0.19
Arg	CGA	30	8.1	0.55		Arg	CGA	24	6.53	0.44
Arg	CGT	8	2.16	0.15		Arg	CGT	15	4.08	0.28
Arg	CGC	5	1.35	0.09		Arg	CGC	5	1.36	0.09
Ser	AGG	37	9.99	0.1		Ser	AGG	38	10.35	0.1
Ser	AGA	68	18.37	0.18		Ser	AGA	72	19.6	0.19
Ser	AGT	41	11.08	0.11		Ser	AGT	37	10.07	0.1
Ser	AGC	7	1.89	0.02		Ser	AGC	11	2.99	0.03
Ser	TCG	12	3.24	0.03		Ser	TCG	9	2.45	0.02
Ser	TCA	71	19.18	0.19		Ser	TCA	82	22.33	0.21
Ser	TCT	109	29.44	0.29		Ser	TCT	105	28.59	0.27
Ser	TCC	29	7.83	0.08		Ser	TCC	31	8.44	0.08
Thr	ACG	4	1.08	0.02		Thr	ACG	4	1.09	0.02
Thr	ACA	80	21.61	0.43		Thr	ACA	60	16.34	0.34
Thr	ACT	67	18.1	0.36		Thr	ACT	86	23.41	0.49
Thr	ACC	35	9.45	0.19		Thr	ACC	24	6.53	0.14
Val	GTG	27	7.29	0.12		Val	GTG	34	9.26	0.14
Val	GTA	104	28.09	0.45		Val	GTA	98	26.68	0.41
Val	GTT	85	22.96	0.37		Val	GTT	88	23.96	0.37
Val	GTC	15	4.05	0.06		Val	GTC	17	4.63	0.07
Trp	TGG	22	5.94	0.23		Trp	TGG	23	6.26	0.23
Trp	TGA	74	19.99	0.77		Trp	TGA	75	20.42	0.77
Tyr	TAT	130	35.12	0.8		Tyr	TAT	118	32.13	0.71
Tyr	TAC	33	8.91	0.2		Tyr	TAC	48	13.07	0.29
End	TAG	3	0.81	0.23		End	TAG	1	0.27	0.08
End	TAA	10	2.7	0.77		End	TAA	12	3.27	0.92

## Sheet: Table S4
Family	Species	T	C	A	G	A + T (%)	G + C (%)	AT–skew	GC–skew
Camptandriidae	Cleistostoma dilatatum	34.7407	19.5234	34.3262	11.4097	69.0669	30.9331	-0.00600038	-0.262299
Cryptochiridae	Hapalocarcinus marsupialis s.l.	34.1039	19.8766	35.4351	10.5844	69.539	30.461	0.0191428	-0.305052
	Kroppcarcinus siderastreicola	37.5008	15.9895	37.0657	9.44398	74.5665	25.4335	-0.00583491	-0.257358
	Opecarcinus hypostegus	34.5179	19.1122	36.0336	10.3363	70.5515	29.4485	0.021484	-0.29801
	Troglocarcinus corallicola	35.1922	18.0278	37.0404	9.73972	72.2325	27.7675	0.0255865	-0.29848
Dotillidae	Dotilla wichmanni	34.7051	20.7115	33.75	10.8333	68.4551	31.5449	-0.0139526	-0.313148
	Ilyoplax deschampsi	35.4722	19.6572	34.1462	10.7245	69.6184	30.3816	-0.0190467	-0.294017
	Scopimera intermedia	33.7355	18.8835	35.3296	12.0515	69.0651	30.9349	0.0230817	-0.220852
Gecarcinidae	Cardisoma armatum	33.7354	20.6532	35.3266	10.2849	69.062	30.938	0.0230398	-0.335131
	Cardisoma carnifex	33.4487	20.9912	35.4107	10.1494	68.8594	31.1406	0.0284916	-0.348157
	Gecarcoidea lalandii	37.2905	15.8074	37.6629	9.23917	74.9535	25.0465	0.0049683	-0.26224
Grapsidae	Grapsus albolineatus	33.9737	20.6168	33.389	12.0206	67.3627	32.6373	-0.00867907	-0.263386
	Grapsus tenuicrustatus	33.1063	22.8465	31.9208	12.1264	65.0271	34.9729	-0.0182312	-0.306527
	Metopograpsus frontalis	36.9539	19.2661	32.7709	11.0092	69.7248	30.2752	-0.0599926	-0.272727
	Metopograpsus quadridentatus	36.0314	19.5141	34.2721	10.1824	70.3035	29.6965	-0.0250252	-0.314236
	Pachygrapsus crassipes	35.791	20.9877	30.4881	12.7332	66.2791	33.7209	-0.0800077	-0.24479
	Pachygrapsus marmoratus	36.9856	19.4859	31.3969	12.1316	68.3824	31.6176	-0.0817276	-0.232601
Macrophthalmidae	Macrophthalmus abbreviatus	32.5144	22.1113	34.7445	10.6298	67.2589	32.7411	0.0331572	-0.350674
	Macrophthalmus darwinensis	33.9857	20.6548	34.3058	11.0537	68.2915	31.7085	0.00468637	-0.302795
	Macrophthalmus japonicus	32.7458	22.6592	33.6487	10.9462	66.3946	33.6054	0.0135991	-0.348546
	Macrophthalmus pacificus	33.3527	21.8558	34.1946	10.5969	67.5473	32.4527	0.0124645	-0.346931
Mictyridae	Mictyris longicarpus	36.5835	19.1536	32.4286	11.8343	69.0121	30.9879	-0.060205	-0.236198
Ocypodidae	Austruca lactea	34.6446	18.5261	34.8426	11.9867	69.4872	30.5128	0.002849	-0.214316
	Cranuca inversa	35.2044	18.0902	35.7658	10.9396	70.9702	29.0298	0.0079094	-0.246319
	Gelasimus borealis	34.3828	19.0689	35.0278	11.5205	69.4106	30.5894	0.00929248	-0.246764
	Minuca minax	37.0898	16.6342	36.0105	10.2654	73.1003	26.8997	-0.0147639	-0.236762
	Ocypode ceratophthalmus	35.6629	19.4484	33.7534	11.1354	69.4162	30.5838	-0.0275076	-0.27181
	Ocypode cordimanus	34.5296	21.7637	31.8124	11.8944	66.342	33.658	-0.0409583	-0.293222
	Ocypode stimpsoni	34.0875	20.8138	33.6954	11.4032	67.783	32.217	-0.00578473	-0.292099
	Tubuca capricornis	35.0118	18.1138	35.4789	11.3955	70.4908	29.5092	0.00662612	-0.227667
	Tubuca paradussumieri	34.9494	18.1888	35.8652	10.9965	70.8147	29.1853	0.012933	-0.246434
	Tubuca polita	34.9987	17.5089	36.5939	10.8984	71.5926	28.4074	0.0222816	-0.232704
	Tubuca rosea	34.5288	18.591	36.5938	10.2864	71.1226	28.8774	0.0290337	-0.28758
Pinnotheridae	Amusiotheres obtusidentatus	38.309	15.8346	35.8844	9.97202	74.1933	25.8067	-0.0326797	-0.227174
	Arcotheres purpureus	34.5061	20.1942	35.1353	10.1643	69.6414	30.3586	0.00903429	-0.330382
	Arcotheres sinensis	36.695	18.4112	34.9424	9.95149	71.6374	28.3626	-0.0244646	-0.298268
	Arcotheres sp.	36.8505	17.5633	35.8051	9.78115	72.6556	27.3444	-0.0143879	-0.284596
	Indopinnixa haematosticta	35.7401	19.2565	34.4519	10.5515	70.192	29.808	-0.0183534	-0.292035
	Pinnaxodes major	34.6024	20.6308	33.7399	11.0269	68.3423	31.6577	-0.0126194	-0.303366
	Pinnotheres excussus	37.5691	17.7815	34.886	9.76337	72.4551	27.5449	-0.0370307	-0.291094
	Pinnotheres pholadis	36.569	17.5471	35.4676	10.4163	72.0366	27.9634	-0.0152889	-0.255007
Plagusiidae	Plagusia squamosa	35.5757	18.8551	34.3467	11.2225	69.9224	30.0776	-0.0175763	-0.253763
Sesarmidae	Chiromantes haematocheir	38.2791	14.9506	37.3294	9.44085	75.6085	24.3915	-0.0125614	-0.22589
	Clistocoeloma sinense	38.6158	14.9179	37.1068	9.35948	75.7227	24.2773	-0.0199277	-0.228954
	Cristarma eulimene	38.4044	14.7603	37.1272	9.70807	75.5316	24.4684	-0.0169096	-0.20648
	Metopaulias depressus	39.3784	13.9676	37.9448	8.70917	77.3232	22.6768	-0.0185398	-0.231888
	Nanosesarma minutum	39.7135	13.3977	37.974	8.91475	77.6875	22.3125	-0.0223905	-0.200917
	Orisarma neglectum	38.4044	14.7603	37.1272	9.70807	75.5316	24.4684	-0.0169096	-0.20648
	Orisarma neglectum	38.2098	14.8555	37.4246	9.51005	75.6344	24.3656	-0.0103812	-0.219386
	Orisarma sinense	38.3087	14.9324	37.3719	9.38699	75.6806	24.3194	-0.0123785	-0.228025
	Parasesarma affine	38.2274	15.1042	36.6031	10.0652	74.8305	25.1695	-0.0217057	-0.200203
	Parasesarma bidens	38.2009	15.1333	36.6089	10.0569	74.8098	25.1902	-0.0212802	-0.201523
	Parasesarma pictum	38.9981	14.5731	36.6024	9.8264	75.6005	24.3995	-0.0316895	-0.194539
	Parasesarma tripectinis	37.9836	15.6674	36.2349	10.114	74.2185	25.7815	-0.0235609	-0.215404
Varunidae	Asthenognathus inaequipes	34.338	19.1553	35.8606	10.646	70.1986	29.8014	0.0216906	-0.285534
	Chasmagnathus convexus	34.1894	20.9307	32.8325	12.0474	67.0219	32.9781	-0.0202469	-0.26937
	Cyclograpsus intermedius	35.912	18.6789	34.6824	10.7266	70.5944	29.4056	-0.0174179	-0.270435
	Eriocheir hepuensis	36.6226	17.4422	35.1589	10.7764	71.7814	28.2186	-0.0203908	-0.236222
	Eriocheir japonica	36.4543	17.6614	35.1639	10.7204	71.6182	28.3818	-0.0180172	-0.244559
	Eriocheir sinensis	36.3731	17.6269	35.315	10.685	71.6881	28.3119	-0.0147598	-0.245193
	Gaetice depressus	37.5798	16.5275	35.3819	10.5108	72.9617	27.0383	-0.0301245	-0.222525
	Helicana wuana	35.4667	20.0318	32.9543	11.5472	68.4211	31.5789	-0.0367194	-0.26868
	Helice latimera	35.1348	19.9249	33.9714	10.9689	69.1062	30.8938	-0.0168344	-0.289898
	Helice tientsinensis	35.1283	19.942	33.9317	10.998	69.06	30.94	-0.0173276	-0.289075
	Hemigrapsus penicillatus	36.443	18.1063	34.0835	11.3672	70.5265	29.4735	-0.0334566	-0.228648
	Hemigrapsus sanguineus	35.4962	19.0538	34.2673	11.1828	69.7634	30.2366	-0.0176149	-0.260313
	Metaplax longipes	33.8362	17.9454	37.6081	10.6102	71.4443	28.5557	0.0527942	-0.256873
	Neoeriocheir leptognathus	39.0448	15.2884	35.6006	10.0663	74.6454	25.3546	-0.0461411	-0.205961
	Pseudohelice subquadrata	33.5365	21.7304	34.1875	10.5456	67.724	32.276	0.00961202	-0.346535
	Tritodynamia horvathi	35.713	18.0105	35.5035	10.773	71.2165	28.7835	-0.00294067	-0.251444
	Varuna litterata	36.4867	17.5848	35.5943	10.3342	72.081	27.919	-0.0123815	-0.2597
	Varuna yui	36.4836	17.5946	35.6981	10.2237	72.1817	27.8183	-0.0108819	-0.264965
Xenograpsidae	Xenograpsus ngatama	36.8434	17.4966	36.0921	9.56786	72.9356	27.0644	-0.0103005	-0.292957
	Xenograpsus testudinatus	37.2136	16.7679	36.7008	9.31764	73.9144	26.0856	-0.00693671	-0.28561
Xenophthalmidae	Xenophthalmus pinnotheroides	32.5438	20.8796	36.3188	10.2578	68.8626	31.1374	0.0548191	-0.341125

## Sheet: Table S5
Maxlimum likelihood (ML)
Partitions	Model
atp6	GTR+I+G
atp8	TVM+I+G
cob	GTR+I+G
cox1	GTR+I+G
cox2	GTR+I+G
cox3	GTR+I+G
nad1	TVM+I+G
nad2	TVM+I+G
nad3	GTR+I+G
nad4	TVM+I+G
nad4l	TVM+I+G
nad5	TVM+I+G
nad6	GTR+I+G
12S rRNA	TVM+I+G
16S rRNA	GTR+I+G
Bayesian Inference (BI)
Partitions	Model
atp6	GTR+I+G
atp8	GTR+I+G
cob	GTR+I+G
cox1	GTR+I+G
cox2	GTR+I+G
cox3	GTR+I+G
nad1	GTR+I+G
nad2	GTR+I+G
nad3	GTR+I+G
nad4	GTR+I+G
nad4l	GTR+I+G
nad5	GTR+I+G
nad6	GTR+I+G
12S rRNA	GTR+I+G
16S rRNA	GTR+I+G

## Sheet: Table S6
Species	atp6	atp8	cob	cox1	cox2	cox3	nad1	nad2	nad3	nad4	nad4l	nad5	nad6
Amusiotheres obtusidentatus	0.0287728	0.093965	0.00440553	0.0278063	0.0803886	0.0444808	999	0.0412932	0.014358	0.0184725	0.00532832	0.0242105	0.0535443
Arcotheres purpureus	0.00982382	0.0992745	0.0134649	0.00950792	0.00451923	0.0114142	0.0129566	0.0558368	0.0381129	0.0265645	0.0130315	0.0742219	0.0358974
Arcotheres sinensis	0.0114685	0.0245796	0.0255715	0.00317222	0.067432	0.0142418	0.0112657	0.0286399	0.0550644	0.0234898	0.0111005	0.0239376	0.0616395
Arcotheres sp.	0.0380004	701.964	0.00903005	0.00340866	0.00931232	0.0161549	0.005588	0.034647	0.0542288	0.0315915	0.0279157	0.027879	0.0426366
Asthenognathus inaequipes	0.0176652	0.0183336	0.00889042	0.0123197	0.00779689	0.00826797	0.00809584	0.0284931	0.050386	0.0361828	0.00690239	0.0226202	0.0193088
Austruca lactea	0.0185055	0.00115496	0.00269335	0.0112177	0.0155545	0.00672081	0.00687652	0.0382262	0.0201293	0.0176771	0.0416469	0.0203667	0.0537711
Cardisoma armatum	0.0001	0.0119888	0.0001	0.0001	0.0001	0.0106228	0.00701817	0.0580325	0.0001	0.0102351	0.0001	0.0151871	0.0217413
Cardisoma carnifex	0.00747577	0.0122461	0.00476353	0.00184269	0.0001	0.00442294	0.00485128	0.0103191	0.032898	0.0244918	0.0001	0.00935728	0.0487591
Chasmagnathus convexus	0.0150464	0.0635521	0.00538537	0.00874424	0.0156656	0.0102387	0.0102006	0.0255687	0.0359579	0.00826914	0.0131395	0.0166925	0.0466856
Chiromantes haematocheir	0.0001	0.0001	0.110246	698.101	0.0001	0.0001	0.0001	0.0001	0.0001	0.0001	0.177579	0.0001	0.0922537
Cleistostoma dilatatum	0.00345525	0.0238819	0.0112726	0.00235869	0.0124129	0.00864541	0.00493962	0.0113786	0.00457111	0.0108956	0.00698546	0.0178378	0.00687721
Clistocoeloma sinense	0.0366528	0.364991	0.0138551	0.0001	0.00698412	0.016327	0.0437085	0.0305165	0.0144828	0.0114563	0.0337373	0.0094252	0.0388957
Cranuca inversa	0.00996696	856.687	0.00464948	0.00435032	0.0020247	0.0001	0.00375246	0.0231662	0.0094699	0.0333204	0.00148468	0.00683735	0.0255245
Cristarma eulimene	0.0272877	0.0371402	0.0133298	0.00289998	0.0167663	0.0390654	0.0001	0.0100683	0.0141825	0.00969617	0.0001	0.00839599	0.0405853
Cyclograpsus intermedius	0.0134741	0.228404	0.00404799	0.00318563	0.00861159	0.00307273	0.00762368	0.0141188	0.01838	0.0133477	0.00195285	0.00966023	0.0234922
Dotilla wichmanni	0.0211295	213.65	0.00806482	0.0117098	0.0110369	0.00516415	0.00830567	0.02085	0.0129375	0.0154372	0.00663516	0.0132257	0.0264152
Eriocheir hepuensis	0.0001	0.0001	0.01072	0.00826594	0.0001	0.0001	441.447	0.012327	0.0001	0.0757008	0.0563563	0.0243916	807.606
Eriocheir japonica	0.0195855	0.323233	0.0174348	0.00587171	0.0001	0.0438637	0.0228184	0.0676968	0.0349906	0.00585754	0.0001	0.00458437	0.0611578
Eriocheir sinensis	0.0001	0.0001	0.0001	0.0001	0.0278382	0.0001	0.020973	0.0317305	0.160214	0.0102385	0.0001	0.00991319	0.204264
Gaetice depressus	0.0107669	0.063013	0.00757376	0.000820471	0.00466985	0.00935097	0.0109509	0.0175768	0.00442066	0.0245439	0.00478106	0.0207584	0.0225393
Gecarcoidea lalandii	0.0136907	0.0169695	0.00563918	0.003666	0.0180142	0.0168528	0.00802965	0.0169453	0.0206807	0.024427	0.000529112	0.0196224	0.0246515
Gelasimus borealis	0.0332535	0.0171302	0.00513043	0.000100762	0.0228573	0.0001	0.00386163	0.0128827	0.0159163	0.00732309	10.7489	0.0116972	0.00771982
Grapsus albolineatus	0.0232384	0.330197	0.00484517	0.00469966	0.0055547	0.0375333	0.00668865	0.0420206	0.0126979	0.0113888	0.00770734	0.0103552	0.018981
Grapsus tenuicrustatus	0.00621376	0.0190437	0.00211901	0.00286185	0.00583327	0.00453676	0.0140664	0.0221086	0.0120878	0.0226252	999	0.00661107	0.00398119
Hapalocarcinus marsupialis s.l.	0.0129949	0.0112732	0.0112321	0.00750606	0.00594517	0.0122935	0.0034428	0.0180915	0.0262752	0.0164356	0.0110048	0.0137133	0.0425607
Helicana wuana	0.0259119	0.0452602	0.00381238	0.00322277	0.0001	0.00484844	0.00755523	0.0295965	0.0231421	0.0192425	0.017765	0.0240498	0.0260908
Helice latimera	0.0001	65.6553	999	0.0001	0.0001	0.0001	0.0001	28.1592	0.0001	0.0001	0.0001	0.0001	47.5195
Helice tientsinensis	0.0001	74.1297	52.2323	0.296278	0.0001	0.0001	0.0001	24.9009	0.0001	18.4277	0.0001	0.0892417	41.8916
Hemigrapsus penicillatus	0.00859709	0.00672882	0.00718328	0.00111664	0.0104698	0.0129079	0.0140442	0.023032	0.0148158	0.0323941	0.00556512	0.0231071	0.0341806
Hemigrapsus sanguineus	0.0229801	0.0296607	0.00870989	0.00787346	0.00392674	0.00806489	0.0440355	0.0256817	0.0442858	0.0130825	0.00645997	0.0142676	0.0719294
Ilyoplax deschampsi	0.0118956	0.0858641	0.00466272	0.00327178	0.00327756	0.0107914	0.0181936	0.0194661	0.0103289	0.015961	0.0001	0.0168115	0.0152838
Indopinnixa haematosticta	0.00839576	0.23518	0.00557968	0.00435683	0.00942942	0.00841673	0.00988349	0.0268348	0.0158884	0.0157036	0.0121517	0.0151657	0.00161722
Kroppcarcinus siderastreicola	0.0308549	766.706	0.0140803	0.0113061	0.00640502	0.0107729	0.0202692	0.0282949	0.0153612	0.0158104	0.0243763	0.012562	0.016599
Macrophthalmus abbreviatus	0.0104286	0.048562	0.0155134	0.00542356	0.0259032	0.00495388	0.00552568	0.0540155	0.0349023	0.0231845	0.00434021	0.0253797	0.0528773
Macrophthalmus darwinensis	0.0132703	0.181907	0.00322621	0.00106263	0.00307206	0.0100637	0.0159578	0.0340734	0.0491751	0.0237877	0.0381395	0.0166148	0.0233724
Macrophthalmus japonicus	0.0169339	0.00624079	0.0144564	0.00901034	0.0110468	0.0217448	0.00889441	0.0350744	0.00277991	0.0234905	0.00753395	0.0162181	0.0176198
Macrophthalmus pacificus	0.0307511	999	0.0135146	0.00753908	0.016518	0.00662266	0.00999168	0.0391059	0.0400324	0.0218955	0.0246341	0.0213866	0.0743793
Metaplax longipes	0.0239732	0.00655134	0.012109	0.00771445	0.00515441	0.00990403	0.00995183	0.0150753	0.0521319	0.0147515	0.0506398	0.0111122	0.0312583
Metopaulias depressus	0.0673819	0.085668	0.248319	0.0308306	0.0657947	0.087049	0.0869214	0.0998719	0.110123	0.0697106	0.0750679	0.0234657	0.148241
Metopograpsus frontalis	0.0100744	0.00121894	0.0100677	0.00963483	0.0287562	0.00624288	0.00675456	0.0336417	0.0111083	0.0212437	999	0.0481975	0.0257476
Metopograpsus quadridentatus	0.00781963	742.757	0.00156241	0.00228013	0.00209122	0.0123641	0.00508986	0.0239702	0.0140888	0.0102651	0.0167767	0.00511226	0.00910755
Mictyris longicarpus	0.0336681	0.0385599	0.014841	0.0093311	0.0156778	0.0203705	0.00964751	0.0310464	0.016759	0.0366795	0.0458018	0.0291334	0.0626274
Minuca minax	0.00361186	0.0372954	0.00282299	0.00413248	0.00302025	0.00167853	0.013168	0.0194832	0.00058349	0.024049	0.0208954	0.0158903	0.0315489
Nanosesarma minutum	0.0241972	0.752981	0.0701163	0.0145341	0.0472514	0.0203093	0.0443086	0.0733159	0.0455957	0.0489155	0.0105955	0.0471147	0.130001
Neoeriocheir leptognathus	0.0089063	0.921124	0.00713084	0.00274839	0.00477401	0.00866108	0.00412491	0.0320727	0.0142309	0.02194	0.00894383	0.0181866	0.0394313
Ocypode ceratophthalmus	63.2294	0.0119577	0.0326122	0.00711346	0.0256838	0.0115457	0.0173487	0.096973	0.0300076	0.0190761	0.0513494	0.0394745	0.0800484
Ocypode cordimanus	0.00655432	0.0782147	0.00757186	0.00917706	0.00915461	0.0134415	0.0090087	0.0604995	0.0416613	0.0116261	0.0219713	0.0321419	0.00769588
Ocypode stimpsoni	0.00516656	0.00379391	0.00705662	0.00536122	0.00857455	0.00358094	0.00549075	0.0558092	0.0604639	0.0420189	0.0054804	0.0189869	0.0328261
Opecarcinus hypostegus	0.028844	0.00405088	0.0147659	0.00656959	3.58427	0.00901143	0.0210557	0.0247474	0.0432936	0.0110992	0.0214303	0.0344333	0.0273198
Orisarma dehaani	0.0001	0.0001	0.0001	0.0001	0.0001	0.0001	0.0001	0.0001	0.0001	0.0875182	0.0001	0.0001	0.0001
Orisarma neglectum	0.0001	0.0001	0.0001	0.0001	0.0001	0.0001	0.0001	0.0001	0.0001	0.0001	0.522676	0.0001	0.0001
Orisarma sinense	0.0001	0.0001	0.0001	0.0001	0.0001	0.0001	0.0001	0.511495	999	0.0001	0.0499177	0.0001	0.0001
Pachygrapsus crassipes	0.011	0.0753491	0.0141653	0.00108982	0.00482177	0.00126356	0.0130056	0.0213207	0.0463942	0.0170903	0.0163479	0.0121159	0.00939342
Pachygrapsus marmoratus	0.00828231	0.0358931	0.00308518	0.0001	0.00936772	0.00478822	0.0082743	0.0277802	0.0140788	0.0224496	0.0001	0.0210273	0.00311301
Parasesarma affine	0.0001	0.0001	0.0001	0.0001	0.0001	0.0001	0.0001	0.0001	0.0001	0.0001	0.0001	0.0001	0.0001
Parasesarma bidens	0.0001	0.0001	0.0909864	0.0001	0.0001	0.0001	0.0001	0.0001	0.0001	0.0615121	0.0001	0.209206	999
Parasesarma pictum	0.0157138	0.0775376	0.0161099	0.0107855	0.010156	0.0172617	0.000100218	0.0548205	0.0603771	0.0140335	0.0001	0.00424289	0.0116593
Parasesarma tripectinis	0.00799755	0.0001	0.0133843	0.0001	0.0116872	0.0001	0.00975327	0.0170363	0.0001	0.00456381	0.0209862	0.00598613	0.0485917
Pinnaxodes major	0.018642	0.0262587	0.00954693	0.00426645	0.00620294	0.00588957	0.00324788	0.018837	0.033689	0.0132008	0.0189803	0.0353214	0.0163907
Pinnotheres excussus	0.0110831	0.00569047	0.00851432	0.00407289	0.0133728	0.017312	0.00839678	0.0271261	0.00909157	0.0218973	0.0147846	0.013871	0.0569419
Pinnotheres pholadis	0.0341247	0.187167	0.0166638	0.00297379	0.0184099	115.447	0.00588361	0.0667572	0.0001	0.0433691	0.0103863	0.0240591	0.198594
Plagusia squamosa	0.0175896	0.0886641	0.00961335	0.0116266	0.0188334	0.0163364	0.0290821	0.0236819	0.0152404	0.02298	0.0109503	0.0262279	0.0256984
Pseudohelice subquadrata	0.0249313	0.0199578	0.0319627	0.00830774	0.0200148	0.0256618	0.00875723	0.042042	0.0177072	0.029884	0.0129622	0.0326673	0.0286275
Scopimera intermedia	0.0234919	0.0035136	0.00781281	0.00414241	0.0102478	0.00349094	0.00765541	0.0105137	0.0168637	0.0224964	0.00637398	0.0106577	0.0124599
Tritodynamia horvathi	0.0206161	401.677	0.0136532	0.00291809	0.023386	0.0285216	0.0180899	0.0201084	0.0207366	0.0209064	0.0240689	0.0199043	0.0279688
Troglocarcinus corallicola	0.0204649	0.00185353	0.00796705	0.0054316	0.000253911	0.00986489	0.00673942	0.0313092	999	0.00959145	0.0196687	0.0108536	0.0266149
Tubuca capricornis	0.0258495	0.123346	0.00548695	0.00218655	0.0001	0.0001	0.0001	0.00979431	0.0347255	0.06264	0.0295062	0.0001	0.0242176
Tubuca paradussumieri	0.0001	999	0.0001	0.00395763	0.0001	0.0408277	0.00531429	0.0001	0.0290421	0.00726403	0.0001	0.0713719	0.0197634
Tubuca polita	0.0112291	0.0980235	0.00427146	0.00432304	0.00747808	0.008668	0.0150219	0.0285763	0.0234032	0.0295649	0.0133034	0.0103096	0.0431023
Tubuca rosea	0.00521133	0.0001	0.00466585	0.0018942	0.00412641	0.0001	0.0136189	0.0307231	0.0162875	0.0135336	0.0001	0.0073595	0.022224
Varuna litterata	0.0001	0.0001	0.65283	0.0001	0.0001	384.489	0.0001	0.0993362	0.0001	0.0945159	0.0001	319.402	0.0001
Varuna yui	0.0001	0.0001	447.203	0.0001	0.0001	0.0001	0.0001	0.0001	0.0001	0.0001	0.0001	0.0562872	0.0001
Xenograpsus testudinatus	0.0138312	0.133508	0.0168888	0.00607613	0.176278	0.0276769	0.0102784	0.0479514	0.0360533	0.0208653	0.0103424	0.0175794	0.0180504
Xenograpsus ngatama	0.00523481	0.0415279	0.0509367	0.0012766	0.00318951	0.0001	0.0144657	0.0169193	0.0200416	0.0152095	0.023258	0.0468995	0.00810035
Xenophthalmus pinnotheroides	0.0266257	0.00416125	0.0192978	0.0156841	0.00718585	0.0369514	0.00762849	0.00911719	0.0421437	0.0243808	0.0262914	0.0194771	0.0347381
